# Supplementary material for: Functional abilities of cultivable plant growth promoting bacteria associated with wheat (Triticum aestivum L.) crops
Source: PubMed Central journal article supplement (PMC4807380; doi:10.1590/1678-4685-gmb-2015-0140), 2016
Supplement: 1415-4757-gmb-39-1-111-Suppl01.pdf [file 1415-4757-gmb-39-1-111-Suppl01.pdf]

Table S1 - Input dataset for MCA analysis.

| <sup>1</sup> Name | <sup>2</sup> Sid | <sup>3</sup> Phos | <sup>4</sup> IC | <sup>5</sup> Genera  |
|-------------------|------------------|-------------------|-----------------|----------------------|
| JC1               | 1                | 1                 | 2               | Variovorax sp.       |
| JC2               | 1                | 1                 | 1               | Azospirillum sp.     |
| JC3               | 2                | 1                 | 2               | Rhizobium sp.        |
| JC4               | 2                | 1                 | 1               | Achromobacter sp.    |
| JC5               | 2                | 1                 | 3               | Rhizobium sp.        |
| JC6               | 2                | 1                 | 2               | Rhizobium sp.        |
| JC7               | 1                | 1                 | 1               | Stenotrophomonas sp. |
| JC8               | 2                | 1                 | 3               | Rhizobium sp.        |
| JC9               | 1                | 1                 | 1               | Ochrobactrum sp.     |
| JC10              | 1                | 1                 | 3               | Pseudomonas sp.      |
| JC11              | 2                | 1                 | 2               | Serratia sp.         |
| JC12              | 1                | 1                 | 1               | Xanthomonas sp.      |
| JC13              | 1                | 1                 | 1               | Luteibacter sp.      |
| JC14              | 1                | 1                 | 2               | Rhizobium sp.        |
| JC15              | 3                | 1                 | 3               | Pseudomonas sp.      |
| JC16              | 2                | 1                 | 3               | Enterobacter sp.     |
| JC17              | 2                | 1                 | 3               | Enterobacter sp.     |
| JC18              | 2                | 1                 | 2               | Pseudomonas sp.      |
| JC19              | 2                | 1                 | 3               | Enterobacter sp.     |
| JC20              | 2                | 1                 | 1               | Rhizobium sp.        |
| JC21              | 2                | 1                 | 2               | Cedecea sp.          |
| JC22              | 2                | 1                 | 3               | Enterobacter sp.     |
| JC23              | 2                | 1                 | 3               | Enterobacter sp.     |
| JC24              | 2                | 1                 | 1               | Serratia sp.         |
| JC25              | 2                | 1                 | 2               | Serratia sp.         |
| JC26              | 2                | 1                 | 2               | Enterobacter sp.     |
| JC27              | 2                | 1                 | 1               | Serratia sp.         |

|      |   |   |   |                  |
|------|---|---|---|------------------|
| JC28 | 2 | 1 | 3 | Enterobacter sp. |
| JC29 | 2 | 1 | 3 | Enterobacter sp. |
| JC30 | 2 | 1 | 3 | Cedecea sp.      |
| JC31 | 2 | 1 | 2 | Pseudomonas sp.  |
| JC32 | 2 | 1 | 1 | Pseudomonas sp.  |
| JC33 | 1 | 1 | 3 | unidentified     |
| JC34 | 2 | 1 | 1 | unidentified     |
| JC35 | 1 | 1 | 2 | Rhizobium sp.    |
| JC36 | 1 | 1 | 2 | Rhizobium sp.    |
| JC37 | 1 | 1 | 2 | Rhizobium sp.    |
| JC38 | 2 | 1 | 1 | Pseudomonas sp.  |
| JC39 | 1 | 1 | 2 | Rhizobium sp.    |
| JC40 | 2 | 1 | 2 | Pseudomonas sp.  |
| JC41 | 1 | 1 | 3 | Azospirillum sp. |
| JC42 | 1 | 1 | 3 | Azospirillum sp. |
| JC43 | 1 | 1 | 3 | Azospirillum sp. |
| JC44 | 1 | 1 | 3 | Azospirillum sp. |
| JC45 | 2 | 1 | 3 | Enterobacter sp. |
| JC46 | 1 | 1 | 1 | Azospirillum sp. |
| JC47 | 1 | 1 | 2 | Azospirillum sp. |
| JC48 | 1 | 1 | 2 | Pseudomonas sp.  |
| JC49 | 1 | 1 | 2 | Azospirillum sp. |
| JC50 | 1 | 1 | 1 | Pedobacter sp.   |
| JC51 | 1 | 1 | 2 | Burkholderia sp. |
| JC52 | 1 | 2 | 1 | Luteibacter sp.  |
| JC53 | 2 | 1 | 1 | Pandoraea sp.    |
| JC55 | 2 | 1 | 2 | Enterobacter sp. |
| JC56 | 2 | 1 | 3 | Enterobacter sp. |
| JC57 | 2 | 2 | 3 | Cedecea sp.      |
| JC58 | 2 | 1 | 3 | Cedecea sp.      |
| JC59 | 1 | 2 | 1 | Burkholderia sp. |

|      |   |   |   |                    |
|------|---|---|---|--------------------|
| JC60 | 2 | 1 | 2 | Cedecea sp.        |
| SB2  | 1 | 1 | 3 | Rhizobium sp.      |
| SB3  | 2 | 1 | 1 | Pseudomonas sp.    |
| SB4  | 1 | 1 | 2 | Xanthomonas sp.    |
| SB5  | 1 | 1 | 1 | Rhizobium sp.      |
| SB6  | 2 | 1 | 2 | Pseudomonas sp.    |
| SB7  | 2 | 1 | 3 | Pseudomonas sp.    |
| SB8  | 2 | 1 | 2 | Pseudomonas sp.    |
| SB9  | 2 | 1 | 2 | Pseudomonas sp.    |
| SB10 | 2 | 1 | 3 | Pseudomonas sp.    |
| SB11 | 2 | 1 | 1 | Rhizobium sp.      |
| SB12 | 2 | 1 | 2 | Rhizobium sp.      |
| SB13 | 1 | 1 | 1 | Azospirillum sp.   |
| SB14 | 1 | 1 | 2 | Rhizobium sp.      |
| SB15 | 2 | 1 | 1 | Pseudomonas sp.    |
| SB16 | 2 | 1 | 1 | unidentified       |
| SB17 | 2 | 1 | 1 | Serratia sp.       |
| SB18 | 2 | 1 | 2 | Serratia sp.       |
| SB19 | 2 | 1 | 1 | Pseudomonas sp.    |
| SB20 | 2 | 1 | 1 | Pseudomonas sp.    |
| SB21 | 2 | 1 | 1 | Sphingomonas sp.   |
| SB22 | 1 | 1 | 2 | Leclercia sp.      |
| SB23 | 1 | 1 | 2 | Herbaspirillum sp. |
| SB24 | 1 | 1 | 2 | Herbaspirillum sp. |
| SB25 | 2 | 1 | 3 | Erwinia sp.        |
| SB26 | 2 | 1 | 1 | Serratia sp.       |
| SB27 | 2 | 1 | 2 | Serratia sp.       |
| SB28 | 1 | 1 | 2 | Herbaspirillum sp. |
| SB29 | 1 | 1 | 2 | Herbaspirillum sp. |
| SB30 | 2 | 3 | 2 | Serratia sp.       |
| SB31 | 1 | 1 | 3 | Pseudomonas sp.    |

|      |   |   |   |                           |
|------|---|---|---|---------------------------|
| SB32 | 2 | 1 | 1 | <i>Pseudomonas</i> sp.    |
| SB33 | 1 | 1 | 2 | <i>Rhizobium</i> sp.      |
| SB34 | 1 | 1 | 2 | <i>Rhizobium</i> sp.      |
| SB35 | 1 | 1 | 2 | <i>Leclercia</i> sp.      |
| SB36 | 1 | 1 | 2 | <i>Rhizobium</i> sp.      |
| SB37 | 2 | 1 | 1 | <i>Rhizobium</i> sp.      |
| SB38 | 1 | 1 | 2 | <i>Pseudomonas</i> sp.    |
| SB39 | 1 | 1 | 3 | <i>Rhizobium</i> sp.      |
| SB40 | 2 | 1 | 3 | <i>Pseudomonas</i> sp.    |
| SB41 | 2 | 1 | 1 | <i>Azospirillum</i> sp.   |
| SB42 | 1 | 1 | 1 | <i>Sphingomonas</i> sp.   |
| SB43 | 1 | 1 | 1 | <i>Azospirillum</i> sp.   |
| SB44 | 1 | 1 | 1 | <i>Azospirillum</i> sp.   |
| SB45 | 1 | 1 | 2 | <i>Herbaspirillum</i> sp. |
| SB46 | 1 | 1 | 3 | <i>Caulobacter</i> sp.    |
| SB47 | 1 | 1 | 1 | <i>Azospirillum</i> sp.   |
| SB48 | 2 | 1 | 1 | <i>Pseudomonas</i> sp.    |
| SB49 | 2 | 1 | 3 | <i>Pseudomonas</i> sp.    |
| SB50 | 1 | 1 | 1 | <i>Xanthomonas</i> sp.    |
| SB51 | 2 | 1 | 1 | unidentified              |
| SB52 | 2 | 1 | 3 | <i>Cedecea</i> sp.        |
| SB53 | 2 | 1 | 3 | <i>Cedecea</i> sp.        |
| SB54 | 2 | 1 | 3 | <i>Leclercia</i> sp.      |
| SB55 | 2 | 1 | 3 | <i>Cedecea</i> sp.        |
| SB56 | 2 | 1 | 3 | <i>Leclercia</i> sp.      |
| SB57 | 2 | 1 | 3 | <i>Leclercia</i> sp.      |
| SB58 | 2 | 1 | 3 | <i>Leclercia</i> sp.      |
| SB59 | 2 | 1 | 3 | <i>Enterobacter</i> sp.   |
| SB60 | 2 | 1 | 3 | <i>Enterobacter</i> sp.   |
| VA1  | 2 | 1 | 2 | <i>Microbacterium</i> sp. |
| VA2  | 1 | 1 | 2 | <i>Acinetobacter</i> sp.  |

|      |   |   |   |                      |
|------|---|---|---|----------------------|
| VA3  | 1 | 1 | 2 | Sphingobium sp.      |
| VA4  | 2 | 1 | 2 | Azorhizobium sp.     |
| VA5  | 2 | 1 | 1 | Achromobacter sp.    |
| VA6  | 1 | 1 | 1 | Azospirillum sp.     |
| VA7  | 1 | 1 | 1 | Sphingomonas sp.     |
| VA8  | 1 | 1 | 2 | Leclercia sp.        |
| VA9  | 2 | 1 | 1 | unidentified         |
| VA10 | 2 | 1 | 1 | Pseudomonas sp.      |
| VA11 | 2 | 3 | 3 | Leclercia sp.        |
| VA12 | 2 | 1 | 1 | unidentified         |
| VA13 | 2 | 1 | 1 | Pseudomonas sp.      |
| VA14 | 2 | 1 | 2 | Burkholderia sp.     |
| VA15 | 2 | 1 | 2 | Azorhizobium sp.     |
| VA16 | 1 | 1 | 2 | Ochrobactrum sp.     |
| VA17 | 1 | 1 | 1 | Novosphingobium sp.  |
| VA18 | 2 | 1 | 1 | Enterobacter sp.     |
| VA19 | 2 | 1 | 1 | Pseudomonas sp.      |
| VA20 | 2 | 2 | 1 | Serratia sp.         |
| VA21 | 2 | 2 | 1 | Hafnia sp.           |
| VA23 | 2 | 2 | 1 | unidentified         |
| VA24 | 2 | 2 | 1 | unidentified         |
| VA25 | 2 | 3 | 2 | Hafnia sp.           |
| VA26 | 2 | 2 | 1 | unidentified         |
| VA27 | 2 | 2 | 1 | Hafnia sp.           |
| VA28 | 2 | 2 | 2 | Raoultella sp.       |
| VA29 | 2 | 2 | 1 | Hafnia sp.           |
| VA30 | 2 | 2 | 1 | Hafnia sp.           |
| VA31 | 2 | 1 | 1 | Azorhizobium sp.     |
| VA32 | 2 | 1 | 2 | Rhizobium sp.        |
| VA33 | 2 | 1 | 1 | Stenotrophomonas sp. |
| VA35 | 2 | 1 | 2 | Rhizobium sp.        |

|      |   |   |   |                      |
|------|---|---|---|----------------------|
| VA36 | 1 | 1 | 2 | Rhizobium sp.        |
| VA37 | 2 | 2 | 3 | Pantoea sp.          |
| VA38 | 1 | 1 | 1 | Lysobacter sp.       |
| VA39 | 2 | 1 | 1 | Azorhizobium sp.     |
| VA40 | 2 | 1 | 1 | Pseudomonas sp.      |
| VA41 | 2 | 1 | 2 | Ochrobactrum sp.     |
| VA42 | 1 | 2 | 2 | Rhizobium sp.        |
| VA43 | 2 | 1 | 2 | unidentified         |
| VA44 | 2 | 1 | 2 | Rhizobium sp.        |
| VA45 | 2 | 1 | 1 | unidentified         |
| VA46 | 2 | 1 | 1 | unidentified         |
| VA47 | 2 | 2 | 2 | unidentified         |
| VA48 | 2 | 2 | 1 | Burkholderia sp.     |
| VA49 | 2 | 1 | 2 | unidentified         |
| VA50 | 2 | 2 | 3 | Pantoea sp.          |
| VA51 | 2 | 3 | 2 | Acinetobacter sp.    |
| VA52 | 2 | 1 | 1 | Pseudomonas sp.      |
| VA53 | 2 | 1 | 1 | Burkholderia sp.     |
| VA54 | 2 | 1 | 2 | Serratia sp.         |
| VA55 | 2 | 1 | 1 | Serratia sp.         |
| VA56 | 2 | 3 | 1 | Burkholderia sp.     |
| VA57 | 2 | 1 | 1 | Serratia sp.         |
| VA58 | 2 | 1 | 2 | Rhizobium sp.        |
| VA59 | 2 | 3 | 1 | Burkholderia sp.     |
| VA60 | 1 | 1 | 2 | Dyella sp.           |
| CM1  | 3 | 1 | 2 | Stenotrophomonas sp. |
| CM2  | 2 | 1 | 2 | Pseudomonas sp.      |
| CM3  | 2 | 1 | 2 | Pseudomonas sp.      |
| CM4  | 2 | 1 | 2 | Pseudomonas sp.      |
| CM5  | 3 | 1 | 2 | Stenotrophomonas sp. |
| CM6  | 2 | 1 | 2 | Pseudomonas sp.      |

|        |   |   |   |                             |
|--------|---|---|---|-----------------------------|
| CM7    | 3 | 1 | 2 | <i>Pseudomonas</i> sp.      |
| CM8    | 3 | 1 | 2 | <i>Pseudomonas</i> sp.      |
| CM9    | 3 | 1 | 2 | <i>Pseudomonas</i> sp.      |
| CM10   | 3 | 1 | 2 | <i>Pseudomonas</i> sp.      |
| CM11   | 1 | 1 | 2 | <i>Pseudomonas</i> sp.      |
| CM12   | 1 | 1 | 2 | <i>Pseudomonas</i> sp.      |
| CM13   | 1 | 1 | 2 | <i>Pseudomonas</i> sp.      |
| CM14   | 1 | 1 | 1 | <i>Herbaspirillum</i> sp.   |
| CM15   | 2 | 1 | 2 | <i>Pseudomonas</i> sp.      |
| CM16   | 3 | 1 | 2 | <i>Pseudomonas</i> sp.      |
| CM17   | 3 | 1 | 2 | <i>Pseudomonas</i> sp.      |
| CM18   | 2 | 1 | 2 | <i>Pseudomonas</i> sp.      |
| CM19   | 2 | 1 | 2 | <i>Pseudomonas</i> sp.      |
| CM20   | 2 | 1 | 3 | <i>Stenotrophomonas</i> sp. |
| CM21   | 3 | 2 | 2 | <i>Burkholderia</i> sp.     |
| CM22   | 3 | 2 | 2 | <i>Burkholderia</i> sp.     |
| CM23   | 3 | 2 | 2 | <i>Burkholderia</i> sp.     |
| CM24   | 3 | 2 | 2 | <i>Burkholderia</i> sp.     |
| CM25   | 2 | 1 | 1 | <i>Burkholderia</i> sp.     |
| CM26   | 3 | 2 | 2 | <i>Burkholderia</i> sp.     |
| CM27   | 3 | 2 | 2 | <i>Burkholderia</i> sp.     |
| CM28   | 1 | 1 | 3 | <i>Enterobacter</i> sp.     |
| CM29   | 2 | 1 | 2 | <i>Burkholderia</i> sp.     |
| CM30   | 3 | 2 | 2 | <i>Burkholderia</i> sp.     |
| CM6.1  | 3 | 1 | 3 | <i>Pseudomonas</i> sp.      |
| CM19.1 | 2 | 1 | 2 | <i>Pseudomonas</i> sp.      |
| CM31   | 1 | 1 | 2 | <i>Stenotrophomonas</i> sp. |
| CM32   | 1 | 1 | 2 | <i>Achromobacter</i> sp.    |
| CM33   | 1 | 1 | 2 | <i>Microbacterium</i> sp.   |
| CM34   | 1 | 1 | 2 | <i>Microbacterium</i> sp.   |
| CM35   | 1 | 1 | 2 | <i>Microbacterium</i> sp.   |

|        |   |   |   |                             |
|--------|---|---|---|-----------------------------|
| CM36   | 1 | 1 | 2 | <i>Pseudomonas</i> sp.      |
| CM37   | 1 | 1 | 2 | unidentified                |
| CM38   | 2 | 1 | 2 | <i>Pseudomonas</i> sp.      |
| CM39   | 1 | 1 | 3 | <i>Pseudomonas</i> sp.      |
| CM40   | 2 | 1 | 3 | <i>Pseudomonas</i> sp.      |
| CM41   | 1 | 1 | 2 | <i>Burkholderia</i> sp.     |
| CM42   | 1 | 1 | 1 | <i>Burkholderia</i> sp.     |
| CM43   | 3 | 2 | 2 | <i>Burkholderia</i> sp.     |
| CM44   | 3 | 2 | 2 | <i>Burkholderia</i> sp.     |
| CM45   | 1 | 1 | 1 | <i>Burkholderia</i> sp.     |
| CM46   | 3 | 2 | 2 | <i>Burkholderia</i> sp.     |
| CM47   | 1 | 1 | 2 | <i>Burkholderia</i> sp.     |
| CM48   | 1 | 1 | 1 | <i>Burkholderia</i> sp.     |
| CM49   | 1 | 1 | 2 | <i>Dyella</i> sp.           |
| CM50   | 1 | 1 | 2 | <i>Burkholderia</i> sp.     |
| CM51   | 3 | 2 | 2 | <i>Burkholderia</i> sp.     |
| CM52   | 3 | 2 | 3 | <i>Burkholderia</i> sp.     |
| CM54   | 3 | 2 | 2 | <i>Burkholderia</i> sp.     |
| CM55   | 1 | 1 | 1 | <i>Burkholderia</i> sp.     |
| CM57   | 1 | 1 | 1 | <i>Burkholderia</i> sp.     |
| CM58   | 3 | 2 | 1 | <i>Burkholderia</i> sp.     |
| CM59   | 1 | 1 | 1 | <i>Burkholderia</i> sp.     |
| CM33.1 | 1 | 1 | 3 | <i>Rhizobium</i> sp.        |
| CM52.1 | 3 | 2 | 2 | <i>Burkholderia</i> sp.     |
| GM1    | 1 | 1 | 2 | <i>Stenotrophomonas</i> sp. |
| GM2    | 1 | 1 | 2 | <i>Stenotrophomonas</i> sp. |
| GM3    | 2 | 1 | 2 | <i>Stenotrophomonas</i> sp. |
| GM4    | 2 | 1 | 3 | <i>Pseudomonas</i> sp.      |
| GM5    | 1 | 1 | 2 | <i>Pseudomonas</i> sp.      |
| GM6    | 1 | 1 | 2 | <i>Stenotrophomonas</i> sp. |
| GM7    | 1 | 1 | 2 | <i>Achromobacter</i> sp.    |



|      |   |   |   |                      |
|------|---|---|---|----------------------|
| GM8  | 2 | 1 | 3 | Pseudomonas sp.      |
| GM9  | 1 | 1 | 2 | Pseudomonas sp.      |
| GM10 | 1 | 1 | 2 | Stenotrophomonas sp. |
| GM11 | 3 | 2 | 2 | Klebsiella sp.       |
| GM12 | 3 | 2 | 2 | Klebsiella sp.       |
| GM13 | 1 | 1 | 3 | Pseudomonas sp.      |
| GM14 | 2 | 1 | 3 | Enterobacter sp.     |
| GM15 | 1 | 1 | 2 | Rhizobium sp.        |
| GM16 | 1 | 1 | 2 | Pseudomonas sp.      |
| GM17 | 3 | 1 | 2 | Enterobacter sp.     |
| GM18 | 3 | 1 | 3 | unidentified         |
| GM19 | 2 | 1 | 3 | Pseudomonas sp.      |
| GM20 | 1 | 1 | 3 | Pseudomonas sp.      |
| GM22 | 2 | 1 | 2 | Burkholderia sp.     |
| GM23 | 2 | 1 | 2 | Klebsiella sp.       |
| GM24 | 1 | 2 | 2 | Burkholderia sp.     |
| GM25 | 1 | 2 | 3 | Burkholderia sp.     |
| GM26 | 3 | 1 | 3 | Burkholderia sp.     |
| GM27 | 2 | 1 | 2 | Burkholderia sp.     |
| GM29 | 2 | 1 | 2 | Burkholderia sp.     |
| GM30 | 1 | 1 | 2 | Burkholderia sp.     |
| GM31 | 2 | 1 | 2 | Pseudomonas sp.      |
| GM32 | 2 | 1 | 2 | Pseudomonas sp.      |
| GM33 | 2 | 1 | 2 | Enterobacter sp.     |
| GM34 | 2 | 1 | 2 | Citrobacter sp.      |
| GM35 | 2 | 1 | 3 | Pseudomonas sp.      |
| GM36 | 2 | 1 | 2 | Pseudomonas sp.      |
| GM37 | 1 | 1 | 3 | Pseudomonas sp.      |
| GM38 | 1 | 1 | 2 | Pseudomonas sp.      |
| GM39 | 1 | 1 | 2 | Pseudomonas sp.      |
| GM40 | 1 | 1 | 2 | Pseudomonas sp.      |

|        |   |   |   |                             |
|--------|---|---|---|-----------------------------|
| GM41   | 2 | 1 | 3 | <i>Pseudomonas</i> sp.      |
| GM42   | 1 | 1 | 3 | <i>Chryseobacterium</i> sp. |
| GM43   | 1 | 1 | 2 | <i>Pseudomonas</i> sp.      |
| GM44   | 1 | 1 | 3 | <i>Pseudomonas</i> sp.      |
| GM45   | 2 | 2 | 2 | <i>Burkholderia</i> sp.     |
| GM46   | 1 | 1 | 2 | <i>Stenotrophomonas</i> sp. |
| GM47   | 1 | 1 | 2 | <i>Pseudomonas</i> sp.      |
| GM48   | 1 | 1 | 2 | <i>Pseudomonas</i> sp.      |
| GM49   | 1 | 1 | 2 | <i>Pseudomonas</i> sp.      |
| GM50   | 1 | 1 | 2 | <i>Luteibacter</i> sp.      |
| GM51   | 3 | 2 | 1 | <i>Klebsiella</i> sp.       |
| GM53   | 1 | 2 | 2 | <i>Burkholderia</i> sp.     |
| GM54   | 1 | 2 | 2 | <i>Burkholderia</i> sp.     |
| GM55   | 1 | 1 | 2 | <i>Burkholderia</i> sp.     |
| GM57   | 1 | 1 | 2 | <i>Burkholderia</i> sp.     |
| GM58   | 1 | 1 | 2 | <i>Rhizobium</i> sp.        |
| GM59   | 3 | 1 | 2 | <i>Pantoea</i> sp.          |
| GM60   | 1 | 1 | 1 | <i>Luteibacter</i> sp.      |
| GM40.1 | 1 | 1 | 2 | unidentified                |
| GM45.1 | 3 | 2 | 2 | unidentified                |
| BV1    | 2 | 1 | 1 | <i>Stenotrophomonas</i> sp. |
| BV2    | 1 | 1 | 1 | <i>Achromobacter</i> sp.    |
| BV3    | 1 | 1 | 2 | <i>Pseudomonas</i> sp.      |
| BV4    | 2 | 1 | 1 | <i>Stenotrophomonas</i> sp. |
| BV5    | 1 | 1 | 2 | <i>Stenotrophomonas</i> sp. |
| BV6    | 1 | 1 | 1 | <i>Pseudomonas</i> sp.      |
| BV7    | 2 | 1 | 1 | <i>Pseudomonas</i> sp.      |
| BV8    | 1 | 1 | 2 | <i>Xanthomonas</i> sp.      |
| BV9    | 1 | 1 | 2 | <i>Pseudomonas</i> sp.      |
| BV10   | 3 | 1 | 3 | <i>Salmonella</i> sp.       |
| BV11   | 1 | 1 | 2 | <i>Herbaspirillum</i> sp.   |

|        |   |   |   |                             |
|--------|---|---|---|-----------------------------|
| BV12   | 1 | 1 | 3 | <i>Pseudomonas</i> sp.      |
| BV13   | 1 | 1 | 3 | <i>Herbaspirillum</i> sp.   |
| BV14   | 1 | 1 | 3 | <i>Herbaspirillum</i> sp.   |
| BV15   | 3 | 1 | 2 | <i>Xanthomonas</i> sp.      |
| BV16   | 1 | 1 | 1 | <i>Enterobacter</i> sp.     |
| BV17   | 1 | 1 | 2 | <i>Enterobacter</i> sp.     |
| BV18   | 3 | 1 | 1 | <i>Xanthomonas</i> sp.      |
| BV20   | 1 | 1 | 2 | <i>Herbaspirillum</i> sp.   |
| BV21   | 3 | 1 | 3 | <i>Pantoea</i> sp.          |
| BV22   | 3 | 3 | 2 | <i>Enterobacter</i> sp.     |
| BV23   | 2 | 1 | 3 | <i>Shigella</i> sp.         |
| BV24   | 2 | 1 | 2 | <i>Shigella</i> sp.         |
| BV25   | 2 | 1 | 2 | <i>Shigella</i> sp.         |
| BV26   | 2 | 1 | 2 | <i>Pantoea</i> sp.          |
| BV27   | 2 | 1 | 2 | <i>Pantoea</i> sp.          |
| BV28   | 2 | 1 | 1 | <i>Pantoea</i> sp.          |
| BV29   | 1 | 1 | 2 | <i>Shigella</i> sp.         |
| BV30   | 2 | 1 | 1 | <i>Shigella</i> sp.         |
| BV23.1 | 3 | 3 | 3 | <i>Enterobacter</i> sp.     |
| BV31   | 1 | 1 | 2 | <i>Chryseobacterium</i> sp. |
| BV32   | 3 | 1 | 2 | <i>Pseudomonas</i> sp.      |
| BV33   | 2 | 1 | 2 | <i>Pantoea</i> sp.          |
| BV34   | 3 | 1 | 3 | <i>Salmonella</i> sp.       |
| BV35   | 1 | 1 | 3 | <i>Enterobacter</i> sp.     |
| BV36   | 3 | 1 | 3 | <i>Kluyvera</i> sp.         |
| BV37   | 1 | 3 | 3 | <i>Salmonella</i> sp.       |
| BV38   | 1 | 3 | 2 | <i>Salmonella</i> sp.       |
| BV40   | 3 | 1 | 3 | <i>Enterobacter</i> sp.     |
| BV43   | 2 | 1 | 2 | <i>Pantoea</i> sp.          |
| BV45   | 1 | 1 | 1 | <i>Burkholderia</i> sp.     |
| BV47   | 1 | 1 | 1 | <i>Burkholderia</i> sp.     |

|        |   |   |   |                  |
|--------|---|---|---|------------------|
| BV49   | 3 | 1 | 2 | Burkholderia sp. |
| BV50   | 2 | 1 | 2 | Dyella sp.       |
| BV52   | 2 | 1 | 2 | Burkholderia sp. |
| BV53   | 2 | 3 | 2 | Burkholderia sp. |
| BV56   | 3 | 1 | 2 | Burkholderia sp. |
| BV57   | 3 | 3 | 1 | Burkholderia sp. |
| BV59   | 3 | 3 | 2 | Enterobacter sp. |
| BV60   | 3 | 3 | 3 | Burkholderia sp. |
| BV40.1 | 3 | 1 | 3 | Enterobacter sp. |

---

<sup>1</sup>Name: isolate identification.

<sup>2</sup>IC: indolic compounds production level.

<sup>3</sup>Phos: phosphate solubilization level.

<sup>4</sup>Sid: siderophores production level.

<sup>5</sup>Genera: according to partial 16S rRNA gene sequencing.
