# Supplementary material for: Functional abilities of cultivable plant growth promoting bacteria associated with wheat (Triticum aestivum L.) crops
Source: PubMed Central journal article supplement (PMC4807380; doi:10.1590/1678-4685-gmb-2015-0140), 2016
Supplement: 1415-4757-gmb-39-1-111-Suppl02.pdf [file 1415-4757-gmb-39-1-111-Suppl02.pdf]

Table S2 - Input dataset for CatPCA analysis.

| <sup>1</sup> Name | <sup>2</sup> Niche | <sup>3</sup> Sampling<br>Site | <sup>4</sup> Genera  |
|-------------------|--------------------|-------------------------------|----------------------|
| JC1               | 1                  | JC                            | Variovorax sp.       |
| JC2               | 1                  | JC                            | Azospirillum sp.     |
| JC3               | 1                  | JC                            | Rhizobium sp.        |
| JC4               | 1                  | JC                            | Achromobacter sp.    |
| JC5               | 1                  | JC                            | Rhizobium sp.        |
| JC6               | 1                  | JC                            | Rhizobium sp.        |
| JC7               | 1                  | JC                            | Stenotrophomonas sp. |
| JC8               | 1                  | JC                            | Rhizobium sp.        |
| JC9               | 1                  | JC                            | Ochrobactrum sp.     |
| JC10              | 1                  | JC                            | Pseudomonas sp.      |
| JC11              | 1                  | JC                            | Serratia sp.         |
| JC12              | 1                  | JC                            | Xanthomonas sp.      |
| JC13              | 1                  | JC                            | Luteibacter sp.      |
| JC14              | 1                  | JC                            | Rhizobium sp.        |
| JC15              | 1                  | JC                            | Pseudomonas sp.      |
| JC16              | 1                  | JC                            | Enterobacter sp.     |
| JC17              | 1                  | JC                            | Enterobacter sp.     |
| JC18              | 1                  | JC                            | Pseudomonas sp.      |
| JC19              | 1                  | JC                            | Enterobacter sp.     |
| JC20              | 1                  | JC                            | Rhizobium sp.        |
| JC21              | 1                  | JC                            | Cedecea sp.          |
| JC22              | 1                  | JC                            | Enterobacter sp.     |
| JC23              | 1                  | JC                            | Enterobacter sp.     |
| JC24              | 1                  | JC                            | Serratia sp.         |
| JC25              | 1                  | JC                            | Serratia sp.         |
| JC26              | 1                  | JC                            | Enterobacter sp.     |
| JC27              | 1                  | JC                            | Serratia sp.         |

|      |   |    |                  |
|------|---|----|------------------|
| JC28 | 1 | JC | Enterobacter sp. |
| JC29 | 1 | JC | Enterobacter sp. |
| JC30 | 1 | JC | Cedecea sp.      |
| JC31 | 2 | JC | Pseudomonas sp.  |
| JC32 | 2 | JC | Pseudomonas sp.  |
| JC33 | 2 | JC | unidentified     |
| JC34 | 2 | JC | unidentified     |
| JC35 | 2 | JC | Rhizobium sp.    |
| JC36 | 2 | JC | Rhizobium sp.    |
| JC37 | 2 | JC | Rhizobium sp.    |
| JC38 | 2 | JC | Pseudomonas sp.  |
| JC39 | 2 | JC | Rhizobium sp.    |
| JC40 | 2 | JC | Pseudomonas sp.  |
| JC41 | 2 | JC | Azospirillum sp. |
| JC42 | 2 | JC | Azospirillum sp. |
| JC43 | 2 | JC | Azospirillum sp. |
| JC44 | 2 | JC | Azospirillum sp. |
| JC45 | 2 | JC | Enterobacter sp. |
| JC46 | 2 | JC | Azospirillum sp. |
| JC47 | 2 | JC | Azospirillum sp. |
| JC48 | 2 | JC | Pseudomonas sp.  |
| JC49 | 2 | JC | Azospirillum sp. |
| JC50 | 2 | JC | Pedobacter sp.   |
| JC51 | 2 | JC | Burkholderia sp. |
| JC52 | 2 | JC | Luteibacter sp.  |
| JC53 | 2 | JC | Pandoraea sp.    |
| JC55 | 2 | JC | Enterobacter sp. |
| JC56 | 2 | JC | Enterobacter sp. |
| JC57 | 2 | JC | Cedecea sp.      |
| JC58 | 2 | JC | Cedecea sp.      |
| JC59 | 2 | JC | Burkholderia sp. |
| JC60 | 2 | JC | Cedecea sp.      |

|      |   |    |                    |
|------|---|----|--------------------|
| SB2  | 1 | SB | Rhizobium sp.      |
| SB3  | 1 | SB | Pseudomonas sp.    |
| SB4  | 1 | SB | Xanthomonas sp.    |
| SB5  | 1 | SB | Rhizobium sp.      |
| SB6  | 1 | SB | Pseudomonas sp.    |
| SB7  | 1 | SB | Pseudomonas sp.    |
| SB8  | 1 | SB | Pseudomonas sp.    |
| SB9  | 1 | SB | Pseudomonas sp.    |
| SB10 | 1 | SB | Pseudomonas sp.    |
| SB11 | 1 | SB | Rhizobium sp.      |
| SB12 | 1 | SB | Rhizobium sp.      |
| SB13 | 1 | SB | Azospirillum sp.   |
| SB14 | 1 | SB | Rhizobium sp.      |
| SB15 | 1 | SB | Pseudomonas sp.    |
| SB16 | 1 | SB | unidentified       |
| SB17 | 1 | SB | Serratia sp.       |
| SB18 | 1 | SB | Serratia sp.       |
| SB19 | 1 | SB | Pseudomonas sp.    |
| SB20 | 1 | SB | Pseudomonas sp.    |
| SB21 | 1 | SB | Sphingomonas sp.   |
| SB22 | 1 | SB | Leclercia sp.      |
| SB23 | 1 | SB | Herbaspirillum sp. |
| SB24 | 1 | SB | Herbaspirillum sp. |
| SB25 | 1 | SB | Erwinia sp.        |
| SB26 | 1 | SB | Serratia sp.       |
| SB27 | 1 | SB | Serratia sp.       |
| SB28 | 1 | SB | Herbaspirillum sp. |
| SB29 | 1 | SB | Herbaspirillum sp. |
| SB30 | 1 | SB | Serratia sp.       |
| SB31 | 2 | SB | Pseudomonas sp.    |
| SB32 | 2 | SB | Pseudomonas sp.    |
| SB33 | 2 | SB | Rhizobium sp.      |

|      |   |    |                    |
|------|---|----|--------------------|
| SB34 | 2 | SB | Rhizobium sp.      |
| SB35 | 2 | SB | Leclercia sp.      |
| SB36 | 2 | SB | Rhizobium sp.      |
| SB37 | 2 | SB | Rhizobium sp.      |
| SB38 | 2 | SB | Pseudomonas sp.    |
| SB39 | 2 | SB | Rhizobium sp.      |
| SB40 | 2 | SB | Pseudomonas sp.    |
| SB41 | 2 | SB | Azospirillum sp.   |
| SB42 | 2 | SB | Sphingomonas sp.   |
| SB43 | 2 | SB | Azospirillum sp.   |
| SB44 | 2 | SB | Azospirillum sp.   |
| SB45 | 2 | SB | Herbaspirillum sp. |
| SB46 | 2 | SB | Caulobacter sp.    |
| SB47 | 2 | SB | Azospirillum sp.   |
| SB48 | 2 | SB | Pseudomonas sp.    |
| SB49 | 2 | SB | Pseudomonas sp.    |
| SB50 | 2 | SB | Xanthomonas sp.    |
| SB51 | 2 | SB | unidentified       |
| SB52 | 2 | SB | Cedecea sp.        |
| SB53 | 2 | SB | Cedecea sp.        |
| SB54 | 2 | SB | Leclercia sp.      |
| SB55 | 2 | SB | Cedecea sp.        |
| SB56 | 2 | SB | Leclercia sp.      |
| SB57 | 2 | SB | Leclercia sp.      |
| SB58 | 2 | SB | Leclercia sp.      |
| SB59 | 2 | SB | Enterobacter sp.   |
| SB60 | 2 | SB | Enterobacter sp.   |
| VA1  | 1 | VA | Microbacterium sp. |
| VA2  | 1 | VA | Acinetobacter sp.  |
| VA3  | 1 | VA | Sphingobium sp.    |
| VA4  | 1 | VA | Azorhizobium sp.   |
| VA5  | 1 | VA | Achromobacter sp.  |

|      |   |    |                      |
|------|---|----|----------------------|
| VA6  | 1 | VA | Azospirillum sp.     |
| VA7  | 1 | VA | Sphingomonas sp.     |
| VA8  | 1 | VA | Leclercia sp.        |
| VA9  | 1 | VA | unidentified         |
| VA10 | 1 | VA | Pseudomonas sp.      |
| VA11 | 1 | VA | Leclercia sp.        |
| VA12 | 1 | VA | unidentified         |
| VA13 | 1 | VA | Pseudomonas sp.      |
| VA14 | 1 | VA | Burkholderia sp.     |
| VA15 | 1 | VA | Azorhizobium sp.     |
| VA16 | 1 | VA | Ochrobactrum sp.     |
| VA17 | 1 | VA | Novosphingobium sp.  |
| VA18 | 1 | VA | Enterobacter sp.     |
| VA19 | 1 | VA | Pseudomonas sp.      |
| VA20 | 1 | VA | Serratia sp.         |
| VA21 | 1 | VA | Hafnia sp.           |
| VA23 | 1 | VA | unidentified         |
| VA24 | 1 | VA | unidentified         |
| VA25 | 1 | VA | Hafnia sp.           |
| VA26 | 1 | VA | unidentified         |
| VA27 | 1 | VA | Hafnia sp.           |
| VA28 | 1 | VA | Raoultella sp.       |
| VA29 | 1 | VA | Hafnia sp.           |
| VA30 | 1 | VA | Hafnia sp.           |
| VA31 | 2 | VA | Azorhizobium sp.     |
| VA32 | 2 | VA | Rhizobium sp.        |
| VA33 | 2 | VA | Stenotrophomonas sp. |
| VA35 | 2 | VA | Rhizobium sp.        |
| VA36 | 2 | VA | Rhizobium sp.        |
| VA37 | 2 | VA | Pantoea sp.          |
| VA38 | 2 | VA | Lysobacter sp.       |
| VA39 | 2 | VA | Azorhizobium sp.     |

|      |   |    |                             |
|------|---|----|-----------------------------|
| VA40 | 2 | VA | <i>Pseudomonas</i> sp.      |
| VA41 | 2 | VA | <i>Ochrobactrum</i> sp.     |
| VA42 | 2 | VA | <i>Rhizobium</i> sp.        |
| VA43 | 2 | VA | unidentified                |
| VA44 | 2 | VA | <i>Rhizobium</i> sp.        |
| VA45 | 2 | VA | unidentified                |
| VA46 | 2 | VA | unidentified                |
| VA47 | 2 | VA | unidentified                |
| VA48 | 2 | VA | <i>Burkholderia</i> sp.     |
| VA49 | 2 | VA | unidentified                |
| VA50 | 2 | VA | <i>Pantoea</i> sp.          |
| VA51 | 2 | VA | <i>Acinetobacter</i> sp.    |
| VA52 | 2 | VA | <i>Pseudomonas</i> sp.      |
| VA53 | 2 | VA | <i>Burkholderia</i> sp.     |
| VA54 | 2 | VA | <i>Serratia</i> sp.         |
| VA55 | 2 | VA | <i>Serratia</i> sp.         |
| VA56 | 2 | VA | <i>Burkholderia</i> sp.     |
| VA57 | 2 | VA | <i>Serratia</i> sp.         |
| VA58 | 2 | VA | <i>Rhizobium</i> sp.        |
| VA59 | 2 | VA | <i>Burkholderia</i> sp.     |
| VA60 | 2 | VA | <i>Dyella</i> sp.           |
| CM1  | 1 | CM | <i>Stenotrophomonas</i> sp. |
| CM2  | 1 | CM | <i>Pseudomonas</i> sp.      |
| CM3  | 1 | CM | <i>Pseudomonas</i> sp.      |
| CM4  | 1 | CM | <i>Pseudomonas</i> sp.      |
| CM5  | 1 | CM | <i>Stenotrophomonas</i> sp. |
| CM6  | 1 | CM | <i>Pseudomonas</i> sp.      |
| CM7  | 1 | CM | <i>Pseudomonas</i> sp.      |
| CM8  | 1 | CM | <i>Pseudomonas</i> sp.      |
| CM9  | 1 | CM | <i>Pseudomonas</i> sp.      |
| CM10 | 1 | CM | <i>Pseudomonas</i> sp.      |
| CM11 | 1 | CM | <i>Pseudomonas</i> sp.      |

|        |   |    |                             |
|--------|---|----|-----------------------------|
| CM12   | 1 | CM | <i>Pseudomonas</i> sp.      |
| CM13   | 1 | CM | <i>Pseudomonas</i> sp.      |
| CM14   | 1 | CM | <i>Herbaspirillum</i> sp.   |
| CM15   | 1 | CM | <i>Pseudomonas</i> sp.      |
| CM16   | 1 | CM | <i>Pseudomonas</i> sp.      |
| CM17   | 1 | CM | <i>Pseudomonas</i> sp.      |
| CM18   | 1 | CM | <i>Pseudomonas</i> sp.      |
| CM19   | 1 | CM | <i>Pseudomonas</i> sp.      |
| CM20   | 1 | CM | <i>Stenotrophomonas</i> sp. |
| CM21   | 1 | CM | <i>Burkholderia</i> sp.     |
| CM22   | 1 | CM | <i>Burkholderia</i> sp.     |
| CM23   | 1 | CM | <i>Burkholderia</i> sp.     |
| CM24   | 1 | CM | <i>Burkholderia</i> sp.     |
| CM25   | 1 | CM | <i>Burkholderia</i> sp.     |
| CM26   | 1 | CM | <i>Burkholderia</i> sp.     |
| CM27   | 1 | CM | <i>Burkholderia</i> sp.     |
| CM28   | 1 | CM | <i>Enterobacter</i> sp.     |
| CM29   | 1 | CM | <i>Burkholderia</i> sp.     |
| CM30   | 1 | CM | <i>Burkholderia</i> sp.     |
| CM6,1  | 1 | CM | <i>Pseudomonas</i> sp.      |
| CM19.1 | 1 | CM | <i>Pseudomonas</i> sp.      |
| CM31   | 2 | CM | <i>Stenotrophomonas</i> sp. |
| CM32   | 2 | CM | <i>Achromobacter</i> sp.    |
| CM33   | 2 | CM | <i>Microbacterium</i> sp.   |
| CM34   | 2 | CM | <i>Microbacterium</i> sp.   |
| CM35   | 2 | CM | <i>Microbacterium</i> sp.   |
| CM36   | 2 | CM | <i>Pseudomonas</i> sp.      |
| CM37   | 2 | CM | unidentified                |
| CM38   | 2 | CM | <i>Pseudomonas</i> sp.      |
| CM39   | 2 | CM | <i>Pseudomonas</i> sp.      |
| CM40   | 2 | CM | <i>Pseudomonas</i> sp.      |
| CM41   | 2 | CM | <i>Burkholderia</i> sp.     |

|        |   |    |                      |
|--------|---|----|----------------------|
| CM42   | 2 | CM | Burkholderia sp.     |
| CM43   | 2 | CM | Burkholderia sp.     |
| CM44   | 2 | CM | Burkholderia sp.     |
| CM45   | 2 | CM | Burkholderia sp.     |
| CM46   | 2 | CM | Burkholderia sp.     |
| CM47   | 2 | CM | Burkholderia sp.     |
| CM48   | 2 | CM | Burkholderia sp.     |
| CM49   | 2 | CM | Dyella sp.           |
| CM50   | 2 | CM | Burkholderia sp.     |
| CM51   | 2 | CM | Burkholderia sp.     |
| CM52   | 2 | CM | Burkholderia sp.     |
| CM54   | 2 | CM | Burkholderia sp.     |
| CM55   | 2 | CM | Burkholderia sp.     |
| CM57   | 2 | CM | Burkholderia sp.     |
| CM58   | 2 | CM | Burkholderia sp.     |
| CM59   | 2 | CM | Burkholderia sp.     |
| CM33.1 | 2 | CM | Rhizobium sp.        |
| CM52.1 | 2 | CM | Burkholderia sp.     |
| GM1    | 1 | GM | Stenotrophomonas sp. |
| GM2    | 1 | GM | Stenotrophomonas sp. |
| GM3    | 1 | GM | Stenotrophomonas sp. |
| GM4    | 1 | GM | Pseudomonas sp.      |
| GM5    | 1 | GM | Pseudomonas sp.      |
| GM6    | 1 | GM | Stenotrophomonas sp. |
| GM7    | 1 | GM | Achromobacter sp.    |
| GM8    | 1 | GM | Pseudomonas sp.      |
| GM9    | 1 | GM | Pseudomonas sp.      |
| GM10   | 1 | GM | Stenotrophomonas sp. |
| GM11   | 1 | GM | Klebsiella sp.       |
| GM12   | 1 | GM | Klebsiella sp.       |
| GM13   | 1 | GM | Pseudomonas sp.      |
| GM14   | 1 | GM | Enterobacter sp.     |



|      |   |    |                      |
|------|---|----|----------------------|
| GM15 | 1 | GM | Rhizobium sp.        |
| GM16 | 1 | GM | Pseudomonas sp.      |
| GM17 | 1 | GM | Enterobacter sp.     |
| GM18 | 1 | GM | unidentified         |
| GM19 | 1 | GM | Pseudomonas sp.      |
| GM20 | 1 | GM | Pseudomonas sp.      |
| GM22 | 1 | GM | Burkholderia sp.     |
| GM23 | 1 | GM | Klebsiella sp.       |
| GM24 | 1 | GM | Burkholderia sp.     |
| GM25 | 1 | GM | Burkholderia sp.     |
| GM26 | 1 | GM | Burkholderia sp.     |
| GM27 | 1 | GM | Burkholderia sp.     |
| GM29 | 1 | GM | Burkholderia sp.     |
| GM30 | 1 | GM | Burkholderia sp.     |
| GM31 | 2 | GM | Pseudomonas sp.      |
| GM32 | 2 | GM | Pseudomonas sp.      |
| GM33 | 2 | GM | Enterobacter sp.     |
| GM34 | 2 | GM | Citrobacter sp.      |
| GM35 | 2 | GM | Pseudomonas sp.      |
| GM36 | 2 | GM | Pseudomonas sp.      |
| GM37 | 2 | GM | Pseudomonas sp.      |
| GM38 | 2 | GM | Pseudomonas sp.      |
| GM39 | 2 | GM | Pseudomonas sp.      |
| GM40 | 2 | GM | Pseudomonas sp.      |
| GM41 | 2 | GM | Pseudomonas sp.      |
| GM42 | 2 | GM | Chryseobacterium sp. |
| GM43 | 2 | GM | Pseudomonas sp.      |
| GM44 | 2 | GM | Pseudomonas sp.      |
| GM45 | 2 | GM | Burkholderia sp.     |
| GM46 | 2 | GM | Stenotrophomonas sp. |
| GM47 | 2 | GM | Pseudomonas sp.      |
| GM48 | 2 | GM | Pseudomonas sp.      |

|        |   |    |                             |
|--------|---|----|-----------------------------|
| GM49   | 2 | GM | <i>Pseudomonas</i> sp.      |
| GM50   | 2 | GM | <i>Luteibacter</i> sp.      |
| GM51   | 2 | GM | <i>Klebsiella</i> sp.       |
| GM53   | 2 | GM | <i>Burkholderia</i> sp.     |
| GM54   | 2 | GM | <i>Burkholderia</i> sp.     |
| GM55   | 2 | GM | <i>Burkholderia</i> sp.     |
| GM57   | 2 | GM | <i>Burkholderia</i> sp.     |
| GM58   | 2 | GM | <i>Rhizobium</i> sp.        |
| GM59   | 2 | GM | <i>Pantoea</i> sp.          |
| GM60   | 2 | GM | <i>Luteibacter</i> sp.      |
| GM40.1 | 2 | GM | unidentified                |
| GM45.1 | 2 | GM | unidentified                |
| BV1    | 1 | BV | <i>Stenotrophomonas</i> sp. |
| BV2    | 1 | BV | <i>Achromobacter</i> sp.    |
| BV3    | 1 | BV | <i>Pseudomonas</i> sp.      |
| BV4    | 1 | BV | <i>Stenotrophomonas</i> sp. |
| BV5    | 1 | BV | <i>Stenotrophomonas</i> sp. |
| BV6    | 1 | BV | <i>Pseudomonas</i> sp.      |
| BV7    | 1 | BV | <i>Pseudomonas</i> sp.      |
| BV8    | 1 | BV | <i>Xanthomonas</i> sp.      |
| BV9    | 1 | BV | <i>Pseudomonas</i> sp.      |
| BV10   | 1 | BV | <i>Salmonella</i> sp.       |
| BV11   | 1 | BV | <i>Herbaspirillum</i> sp.   |
| BV12   | 1 | BV | <i>Pseudomonas</i> sp.      |
| BV13   | 1 | BV | <i>Herbaspirillum</i> sp.   |
| BV14   | 1 | BV | <i>Herbaspirillum</i> sp.   |
| BV15   | 1 | BV | <i>Xanthomonas</i> sp.      |
| BV16   | 1 | BV | <i>Enterobacter</i> sp.     |
| BV17   | 1 | BV | <i>Enterobacter</i> sp.     |
| BV18   | 1 | BV | <i>Xanthomonas</i> sp.      |
| BV20   | 1 | BV | <i>Herbaspirillum</i> sp.   |
| BV21   | 1 | BV | <i>Pantoea</i> sp.          |

|        |   |    |                      |
|--------|---|----|----------------------|
| BV22   | 1 | BV | Enterobacter sp.     |
| BV23   | 1 | BV | Shigella sp.         |
| BV24   | 1 | BV | Shigella sp.         |
| BV25   | 1 | BV | Shigella sp.         |
| BV26   | 1 | BV | Pantoea sp.          |
| BV27   | 1 | BV | Pantoea sp.          |
| BV28   | 1 | BV | Pantoea sp.          |
| BV29   | 1 | BV | Shigella sp.         |
| BV30   | 1 | BV | Shigella sp.         |
| BV23.1 | 1 | BV | Enterobacter sp.     |
| BV31   | 2 | BV | Chryseobacterium sp. |
| BV32   | 2 | BV | Pseudomonas sp.      |
| BV33   | 2 | BV | Pantoea sp.          |
| BV34   | 2 | BV | Salmonella sp.       |
| BV35   | 2 | BV | Enterobacter sp.     |
| BV36   | 2 | BV | Kluyvera sp.         |
| BV37   | 2 | BV | Salmonella sp.       |
| BV38   | 2 | BV | Salmonella sp.       |
| BV40   | 2 | BV | Enterobacter sp.     |
| BV43   | 2 | BV | Pantoea sp.          |
| BV45   | 2 | BV | Burkholderia sp.     |
| BV47   | 2 | BV | Burkholderia sp.     |
| BV49   | 2 | BV | Burkholderia sp.     |
| BV50   | 2 | BV | Dyella sp.           |
| BV52   | 2 | BV | Burkholderia sp.     |
| BV53   | 2 | BV | Burkholderia sp.     |
| BV56   | 2 | BV | Burkholderia sp.     |
| BV57   | 2 | BV | Burkholderia sp.     |
| BV59   | 2 | BV | Enterobacter sp.     |
| BV60   | 2 | BV | Burkholderia sp.     |
| BV40.1 | 2 | BV | Enterobacter sp.     |

---

<sup>1</sup>Name: isolate identification.

<sup>2</sup>Niche: 1 = roots; 2 = rhizospheric soil.

<sup>3</sup>Sampling site: JC = Júlio de Castilhos, SB = São Borja, VA = Vacaria, CM = Campina das Missões, GM = Guarani das Missões, and BV = Boa Vista do Cadeado.

<sup>4</sup>Genera: according to partial 16S rRNA gene sequencing.
